## 1 **Highlights**

- 2 ● Sensitive cell-based biosensors for 3CLpro inhibitor discovery in BSL-2  
3 laboratories.
- 4 ● The BRET-based self-cleaving biosensors mimic the *in vivo* autoproteolytic  
5 activation of 3CLpro.
- 6 ● Similar biosensors can be designed for other self-cleaving proteases, such as HIV  
7 protease PR and HCV protease NS3.

1 **Abstract:**

2 The 3C-like protease (3CLpro) of SARS-CoV-2 is an attractive drug target for  
3 developing antivirals against SARS-CoV-2. A few small molecule inhibitors of 3CLpro  
4 are in clinical trials for COVID-19 treatments and more inhibitors are being developed.  
5 One limiting factor for 3CLpro inhibitors development is that the cellular activities of  
6 such inhibitors have to be evaluated in a Biosafety Level 3 (BSL-3) or BSL-4 laboratory.  
7 Here, we design genetically encoded biosensors that can be used in BSL-2 laboratories  
8 to set up cell-based assays for 3CLpro inhibitor discovery. The biosensors were  
9 constructed by linking a green fluorescent protein (GFP2) to the N-terminus and a  
10 Renilla luciferase (RLuc8) to the C-terminus of SARS-CoV-2 3CLpro, with the linkers  
11 derived from the cleavage sequences of 3CLpro. After over-expression of the  
12 biosensors in HEK293 cells, 3CLpro can be released from GFP2 and RLuc by self-  
13 cleavage, resulting in a decrease of the bioluminescence resonance energy transfer  
14 (BRET) signal. Using one of these biosensors, pBRET-10, we evaluated the cellular  
15 activities of several 3CLpro inhibitors. These inhibitors restored the BRET signal by  
16 blocking the proteolysis of pBRET-10, and their relative activities measured using  
17 pBRET-10 were consistent with their anti-SARS-CoV-2 activities reported previously.  
18 We conclude that the biosensor pBRET-10 is a useful tool for SARS-CoV-2 3CLpro  
19 inhibitor discovery. Furthermore, our strategy can be used to design biosensors for other  
20 viral proteases that share the same activation mechanism as 3CLpro, such as HIV  
21 protease PR and HCV protease NS3.

22 **Keywords:** SARS-CoV-2; 3C-like protease; inhibitor; self-cleaving biosensor; BRET

## 1 **1. Introduction**

2 The severe acute respiratory syndrome coronavirus 2 (SARS-CoV-2) causing the global  
3 pandemic of COVID-19 poses a great threat to public health (Zhou et al., 2020). Despite  
4 several vaccines have been accessible, effective antivirals are still urgently needed for  
5 the treatment of COVID-19 (Grobler et al., 2020). The RNA genome of SARS-CoV-2  
6 encodes two large overlapping polyproteins pp1a and pp1ab, and several structural  
7 proteins and accessory proteins (Hartenian et al., 2020). During virus replication in host  
8 cells, pp1a and pp1ab are expressed and then cleaved to generate 16 non-structural  
9 proteins (nsps). The cleavages are catalyzed by nsp3 and nsp5 – two proteases included  
10 in the 16 nsps. Specifically, the papain-like protease (PLpro) domain of nsp3 cleaves  
11 the peptides bonds between nsp1 and 2, nsp2 and 3, and nsp3 and 4; the peptide bonds  
12 between other nsps are cleaved by nsp5 (also called 3C-like protease, 3CLpro or the  
13 main protease). Inhibition of 3CLpro is an effective strategy to develop antivirals  
14 against SARS-CoV-2 (Zumla et al., 2016). Several 3CLpro inhibitors have been  
15 reported, two of which are now in COVID-19 clinical trials (Dai et al., 2020; de Vries  
16 et al., 2021; Drayman et al., 2021; Fu et al., 2020; Jin et al., 2020; Vandyck and Deval,  
17 2021; Zhang et al., 2020).

18 Enzymatic assays using purified 3CLpro were frequently used in the initial  
19 screening of 3CLpro inhibitors, but to evaluate the cell permeability and cellular  
20 activities of the inhibitors, cell-based antiviral assays are necessary. The requirement of  
21 Biosafety Level 3 (BSL-3) or BSL-4 laboratories for doing the cell-based anti-SARS-  
22 CoV-2 assays has slowed the development of 3CLpro inhibitors.

23 To set up cell-based 3CLpro assays that can be done in BSL-2 laboratories, several  
24 biosensors have been developed. The first is called Flip-GFP that has a 3CLpro cleavage  
25 site inserted into GFP; the fluorescence of GFP was decreased by the insertion but could  
26 be restored by the 3CLpro-catalyzed cleavage (Froggatt et al., 2020). Similar biosensors  
27 have been developed by other groups (O'Brien et al., 2021; Gerber et al., 2021). The  
28 second is an engineered luciferase having two complementary luciferase fragments

1 linked by a 3CLpro cleavage site; the luminescence was lost by 3CLpro cleavage and  
2 restored when the 3CLpro activity was inhibited (Rawson et al., 2021). The third is a  
3 GFP fusion protein having an ER targeting domain linked to the C-terminus of GFP  
4 through a 3CLpro cleavage site; 3CLpro-catalyzed cleavage led to a translocation of  
5 the GFP from ER to the nucleus which can be quantified using light microscopy  
6 (Pahmeier et al., 2021). The fourth is a biosensor in which a Src myristoylation domain  
7 and a HIV-1 Tat-GFP fusion protein are linked to the N- and C-terminus of 3CLpro,  
8 respectively, through 3CLpro cleavage sites; expression of this biosensor in HEK 293T  
9 cells showed little GFP fluorescence while inhibition of 3CLpro greatly increased the  
10 GFP fluorescence, probably because 3CLpro-catalyzed self-cleavage led to degradation  
11 of the biosensor (Moghadasi et al., 2020).

12 The limitations of these biosensors are that (1) their readouts are highly dependent  
13 on the expression level of the biosensors, and for the first three types of biosensors, the  
14 expression level of 3CLpro also affects the readouts; (2) the first three types of  
15 biosensors require either co-transfection of two plasmids (the biosensor and 3CLpro  
16 plasmids) or transfection of 3CLpro into cells stably expressing the biosensors, while  
17 the fourth only needs to transfect one plasmid but its sensitivity to 3CLpro inhibitor  
18 GC376 was much lower.

19 In this study, we developed a series of BRET-based biosensors to set up cell-based  
20 assays for 3CLpro inhibitor discovery. We linked a green fluorescent protein (GFP2)  
21 and a Renilla luciferase (RLuc8) to the N- and C-terminus of SARS-CoV-2 3CLpro,  
22 respectively, using 3CLpro cleavage sequences as the linkers (Fig. 1A&B). The BRET  
23 from Rluc8 to GFP2 of the biosensors was disrupted upon self-cleavage catalyzed by  
24 3CLpro and can be restored by adding 3CLpro inhibitors. The effect of variance in the  
25 biosensor expression level on the readouts was minimized by normalizing the BRET  
26 signal with the luminescent signal of RLuc8.

## 27 **2. Material and methods**

## 1 *2.1. Construction of plasmids*

2 The gene sequences of RLuc8 and GFP2 are the same as that reported previously (Bery  
3 et al., 2018). The gene sequences of SARS-CoV-2 3CLpro and its cleavage sites are the  
4 same as that in the SARS-CoV-2 genome (NC\_045512.2). The DNA fragment encoding  
5 the biosensor pBRET-1 was synthesized at GENEWIZ (Suzhou, China) and inserted  
6 into pcDNA3.1 vector at the site after the FLAG-tag. Then an HA-tag was added to the  
7 C-terminus of pBRET-1 by Gibson homologous recombination using primers HA-F and  
8 HA-R (Table S1). The plasmid of pBRET<sub>mut</sub>-1 was constructed by introducing the  
9 3CLpro C145A mutation into pBRET-1 through site-directed mutagenesis using  
10 primers C145A-F and C145A-R (Table S1). The plasmids carrying other pBRET  
11 biosensors were constructed on the basis of pBRET-1 using Gibson homologous  
12 recombination method. The primers were shown in Table S1. The protein sequences of  
13 all the BRET-based self-cleaving biosensors were shown in Table S2.

## 14 *2.2. Cell culture*

15 HEK 293T cells were cultured in a humidified incubator maintained at 37 °C with 5%  
16 CO<sub>2</sub>, using the high-glucose Dulbecco's modified Eagle's medium (Gibco)  
17 supplemented with 100 U/mL penicillium-streptomycin (HyClone) and 10% fetal  
18 bovine serum (Gibco).

## 19 *2.3. 3CLpro inhibitors*

20 GC376 (Selleck, S0475) and Boceprevir (Selleck, S3733) were purchased from Selleck.  
21 Compounds 11a and 13b were synthesized following protocols reported previously (Dai  
22 et al., 2020; Zhang et al., 2020).

## 23 *2.4. Western blot and BRET assays*

24 To monitor the self-cleavage of pBRET-1 and to evaluate its sensitivity to 3CLpro  
25 inhibitor GC376, HEK 293T cells were seeded into 6-well cell culture plates at about

1 40% confluence, and after 24 hours the cells were transfected with plasmids carrying  
2 pBRET-1 (5 µg/well) using PEI as the transfection reagent. After transfection, 3CLpro  
3 inhibitors in DMSO were added into the cell culture to reach the indicated working  
4 concentrations. The final DMSO concentration in the cell culture was 0.5%. After  
5 additional 24 hours, the cells were harvested and equally divided into two parts: one  
6 part for western blot analysis, and the other for BRET assay.

7 For western blot analysis, HEK 293T cells were lysed using RIPA buffer (Beyotime,  
8 P0013B). Then equal amounts of total protein in each condition were resolved by SDS-  
9 PAGE and transferred to a PVDF membrane (Merck Millipore, ISEQ00010). The  
10 PVDF membrane was blocked with 1% (for anti-FLAG antibody) or 3% (for anti-HA  
11 antibody) non-fat milk in TBST buffer (Tris-buffered saline containing 0.05% Tween-  
12 20) overnight at 4 °C and incubated with anti-FLAG antibody (Sigma, F1804, 1:1000  
13 dilution) or anti-HA antibody (Abcam, ab9110, 1:1000 dilution) for 2 hours at room  
14 temperature. After being washed three times with TBST buffer, the PVDF membrane  
15 was incubated with anti-rabbit IgG (Merck Millipore, AP156P, 1:20000 dilution) or  
16 anti-mouse IgG (Merck Millipore, AP127P; 1:20000 dilution) for 1 hours, washed with  
17 TBST buffer three times, and developed using Pierce ECL western blotting substrate  
18 (CW BIO, CW0049S).

19 For BRET assay, the cells were resuspended in ice-cold PBS and transferred to a  
20 96-well clear-bottom white plate (Corning, 3610). After adding coelenterazine 400a  
21 (Cayman, 16157) to a final concentration of 20 µM, the luminous signal at 410 nm and  
22 fluorescent signal at 515 nm were measured using a BioTek microplate reader (Biotek  
23 Synergy NEO2). The BRET ratio was calculated using the following equation:

24 
$$\text{BRET ratio} = (F_{515,S} - F_{515,BL}) / (L_{410,S} - L_{410,BL})$$

25 in which  $F_{515,S}$  and  $L_{410,S}$  are the fluorescent (515 nm) and luminescent signals (410 nm),  
26 respectively, of cells expressing pBRET biosensors, and  $F_{515,BL}$  and  $L_{410,BL}$  are the  
27 fluorescent (515 nm) and luminescent signals (410 nm), respectively, of HEK 293T

1 cells without pBRET biosensors.

2 To set up high-throughput BRET assay for optimizing pBRET-1 and evaluating the  
3 activities of different 3CLpro inhibitors, HEK 293T cells were seed into a 96-well clear-  
4 bottom white plate (Corning, 3610) at about 40% confluence, and after 24 hours the  
5 cells were transfected with plasmids carrying the biosensors (0.4  $\mu$ g/well) using PEI as  
6 the transfection reagent. Then 3CLpro inhibitors in DMSO were added into the cell  
7 culture to reach the indicated working concentrations. Twenty-four hours later, the  
8 BRET ratios were measured using same protocols as described above.

### 9 **3. Results and discussion**

#### 10 *3.1. Design of a BRET-based self-cleaving biosensor, pBRET-1*

11 The maximal distance for BRET is about 10 nm (Bacart et al., 2008). According to a  
12 crystal structure of SARS-CoV-2 3CLpro (PDB code: 6Y2E), the distance between the  
13 N- and C-terminus of 3CLpro is 22.9 Å (Zhang et al., 2020). To construct our first  
14 biosensor — pBRET-1, we linked GFP2 to the N-terminus of SARS-CoV-2 3CLpro  
15 using the cleavage sequence between nsp4 and 3CLpro as the linker, and linked RLuc8  
16 to the C-terminus of 3CLpro using the cleavage sequence between 3CLpro and nsp6 as  
17 the linker; furthermore, we added a FLAG tag before GFP2 and a HA tag after RLuc8  
18 (Fig. 1A). We also constructed pBRET<sub>mut</sub>-1, in which the catalytic residue C145 of  
19 3CLpro was mutated to alanine.

20 Transient expression of pBRET-1 in HEK293 cells resulted in a BRET ratio (see  
21 the methods) of about 0.02, while transient expression of pBRET<sub>mut</sub>-1 showed a BRET  
22 ratio of 0.25 (Fig. 1C). Adding GC376, a reported inhibitor of 3CLpro (Fu et al., 2020),  
23 to the cell culture increased the BRET ratio of pBRET-1 in a concentration-dependent  
24 manner. These results indicate that the BRET ratio of pBRET-1 is negatively associated  
25 with the protease activity of 3CLpro.

26 We also monitored the self-cleavage of pBRET-1 in HEK 293T cells using Western



1 blot. We first used anti-HA antibody to detect the self-cleavage products (Fig. 1D). For  
2 pBRET-1 in the absence of GC376, only RLuc was detected; as the concentration of  
3 GC376 increased, the band of the 3CLpro-RLuc8 fragment and that of the full-length  
4 GFP2-3CLpro-Rluc8 fusion protein appeared. We also used anti-FLAG antibody to  
5 detect the self-cleavage products (Fig. 1E). Interestingly, as the concentration of GC376  
6 increased, only the bands of GFP2 and the full-length GFP2-3CLpro-Rluc8 fusion  
7 protein were detected, but no band of the GFP2-3CLpro fragment. These results suggest  
8 that the cleavage at the N-terminus of 3CLpro occurred before the cleavage at the C-  
9 terminus, which is consistent with the maturation process of 3CLpro reported  
10 previously (Li et al., 2010).

### 11 *3.2. Optimization of pBRET-1*

12 There are eleven 3CLpro cleavage sites in the polyproteins pp1a and pp1ab of SARS-  
13 CoV-2 (Mody et al., 2021). The efficiencies of 3CLpro to cleave these sites are different.  
14 We presume that modulating the self-cleaving efficiency of pBRET-1 by changing the  
15 cleavage sequence between GFP2 and 3CLpro and that between 3CLpro and RLuc8  
16 may increase the sensitivity of the biosensor to 3CLpro inhibitors. As shown in Fig. 2,  
17 nine pBRET biosensors were designed and their sensitivities to GC376 were tested.  
18 Among them, pBRET-10 showed the highest sensitivity, with an EC<sub>50</sub> value of 2.72 μM  
19 for GC376; in contrast, the EC<sub>50</sub> value measured using pBRET-1 was 11.60 μM (Fig.  
20 2C).

### 21 *3.3. Evaluation of the cellular activities of 3CLpro inhibitors using pBRET-10*

22 As pBRET-10 has the highest sensitivity, we measured the EC<sub>50</sub> values of three other  
23 3CLpro inhibitors (Boceprevir, compounds 11a and 13b) using pBRET-10 (Table 1)  
24 (Dai et al., 2020; Fu et al., 2020; Zhang et al., 2020). Compound 11a showed an activity  
25 slightly lower than GC376, while the activities of Boceprevir and compound 13b were  
26 an order of magnitude lower than that of GC376. The EC<sub>50</sub> values of GC376 and  
27 Boceprevir are comparable to that measured using cell-based anti-SARS-CoV-2 assays

1 (Fu et al., 2020). But for compounds 11a and 13b, the EC<sub>50</sub> values from our  
2 measurement were about 9 times the reported values from anti-SARS-CoV-2 assays  
3 (Dai et al., 2020; Zhang et al., 2020).

#### 4 **4. Conclusion**

5 We have developed a class of BRET-based self-cleaving biosensors that can be used in  
6 BSL-2 laboratories to set up cell-based assays for 3CLpro inhibitor discovery. One of  
7 them, pBRET-10, showed comparable sensitivity to cell-based antiviral assays. Self-  
8 cleavage catalyzed by 3CLpro in these biosensors mimics the activation process of  
9 3CLpro during coronavirus replication. In addition to the 3CLpro of SARS-CoV-2,  
10 similar biosensors can be developed to screen inhibitors of 3C-like proteases of other  
11 coronaviruses. Furthermore, many other viruses (such as HIV, HCV, Dengur virus, Zika  
12 virus, and West Nile virus) also utilize a replication strategy involving the expression  
13 of a polyprotein containing a self-cleaving protease (Huang et al., 2019; Lin, 2006;  
14 Majerová et al., 2019; Suthar et al., 2013; Yost and Marcotrigiano, 2013); therefore,  
15 our strategy can also be used to develop biosensors for proteases of these viruses, for  
16 example, the HIV protease PR and HCV protease NS3.

#### 17 **Declaration of competing interest**

18 The authors declare the following financial interests which may be considered as  
19 potential competing interests: One or more authors have a pending patent related to this  
20 work.

#### 21 **CRedit authorship contribution statement**

22 **Ningke Hou:** Conceptualization, Methodology, Investigation, Data curation,  
23 Visualization, Writing – original draft. **Chen Peng:** Investigation, Data curation,  
24 Writing – original draft. **Lijing Zhang:** Resources, Validation. **Yuyao Zhu:**  
25 Investigation. **Qi Hu:** Supervision, Conceptualization, Project administration, Funding  
26 acquisition, Writing – Review & Editing.

## 1 Acknowledgements

2 The work is supported by Westlake Education Foundation and Tencent Foundation.

## 3 References:

Bacart, J., Corbel, C., Jockers, R., Bach, S., Couturier, C., 2008. *Biotechnol. J.* 3, 311–324.

Bery, N., Cruz-Migoni, A., Bataille, C.J., Quevedo, C.E., Tulmin, H., Miller, A., Russell, A., Phillips, S.E., Carr, S.B., Rabbitts, T.H., 2018. *eLife* 7, e37122

Dai, W., Zhang, B., Jiang, X.-M., Su, H., Li, J., Zhao, Y., Xie, X., Jin, Z., Peng, J., Liu, F., Li, C., Li, Y., Bai, F., Wang, H., Cheng, X., Cen, X., Hu, S., Yang, X., Wang, J., Liu, X., Xiao, G., Jiang, H., Rao, Z., Zhang, L.-K., Xu, Y., Yang, H., Liu, H., 2020. *Science* 368, 1331–1335.

de Vries, M., Mohamed, A.S., Prescott, R.A., Valero-Jimenez, A.M., Desvignes, L., O'Connor, R., Steppan, C., Devlin, J.C., Ivanova, E., Herrera, A., Schinlever, A., Loose, P., Ruggles, K., Korolov, S.B., Anderson, A.S., Binder, J., Dittmann, M., 2021. *J. Virol.* 95, e01819-20.

Drayman, N., DeMarco, J.K., Jones, K.A., Azizi, S.-A., Froggatt, H.M., Tan, K., Maltseva, N.I., Chen, S., Nicolaescu, V., Dvorkin, S., Furlong, K., Kathayat, R.S., Firpo, M.R., Mastrodomenico, V., Bruce, E.A., Schmidt, M.M., Jedrzejczak, R., Muñoz-Alía, M.Á., Schuster, B., Nair, V., Han, K., O'Brien, A., Tomatsidou, A., Meyer, B., Vignuzzi, M., Missiakas, D., Botten, J.W., Brooke, C.B., Lee, H., Baker, S.C., Mounce, B.C., Heaton, N.S., Severson, W.E., Palmer, K.E., Dickinson, B.C., Joachimiak, A., Randall, G., Tay, S., 2021. *Science* eabg5827.

Froggatt, H.M., Heaton, B.E., Heaton, N.S., 2020. *J. Virol.* 94. e01265-20

Fu, L., Ye, F., Feng, Y., Yu, F., Wang, Q., Wu, Y., Zhao, C., Sun, H., Huang, B., Niu, P., Song, H., Shi, Y., Li, X., Tan, W., Qi, J., Gao, G.F., 2020. *Nat. Commun.* 11, 4417.

Grobler, J.A., Anderson, A.S., Fernandes, P., Diamond, M.S., Colvis, C.M., Menetski, J.P., Alvarez, R.M., Young, J.A.T., Carter, K.L., 2020. *Cell Host Microbe* 28, 638–645.

Gerber, P.P., Duncan, L.M., Greenwood, E.J., Marelli, S., Naamati, A., Teixeira-Silva, A., Crozier, T.W., Gabaev, I., Zhan, J.R., Protasio, A.V., Matheson, N.J., 2021. *bioRxiv*. 2021.03.22.435957.

Hartenian, E., Nandakumar, D., Lari, A., Ly, M., Tucker, J.M., Glaunsinger, B.A., 2020. *J. Biol. Chem.* 295, 12910–12934.

Huang, L., Li, L., Tien, C., LaBarbera, D.V., Chen, C., 2019. *Sci. Rep.* 9, 301.

Jin, Z., Du, X., Xu, Y., Deng, Y., Liu, M., Zhao, Y., Zhang, B., Li, X., Zhang, L., Peng, C., Duan, Y., Yu, J., Wang, L., Yang, K., Liu, F., Jiang, R., Yang, Xinglou, You, T., Liu, Xiaoce, Yang, Xiuna, Bai, F., Liu, H., Liu, Xiang, Guddat, L.W., Xu, W., Xiao, G., Qin, C., Shi, Z., Jiang, H., Rao, Z., Yang, H., 2020. *Nature* 582, 289–293.

Li, C., Qi, Y., Teng, X., Yang, Z., Wei, P., Zhang, C., Tan, L., Zhou, L., Liu, Y., Lai, L., 2010. *J. Biol. Chem.* 285, 28134–28140.

Lin, C., 2006. HCV NS3-4A Serine Protease. *Genomes Mol. Biol. Norfolk UK Horiz.*

Biosci. Chapter 6, 44.

Majerová, T., Novotný, P., Krýsová, E., Konvalinka, J., 2019. *Biochimie* 166, 132–141.

Mody, V., Ho, J., Wills, S., Mawri, A., Lawson, L., Ebert, M.C.C.J.C., Fortin, G.M., Rayalam, S., Taval, S., 2021. *Commun. Biol.* 4, 1–10.

Moghadas, S.A., Becker, J.T., Belica, C., Wick, C., Brown, W.L., Harris, R.S., 2020. *bioRxiv*. 2020.11.09.375139

O'Brien, A., Chen, D.-Y., Hackbart, M., Close, B.J., O'Brien, T.E., Saeed, M., Baker, S.C., 2021. *Virology* 556, 73–78.

Pahmeier, F., Neufeldt, C.J., Cerikan, B., Prasad, V., Pape, C., Laketa, V., Ruggieri, A., Bartenschlager, R., Cortese, M., 2021. *J. Virol.* 95, e01715-20.

Rawson, J.M.O., Duchon, A., Nikolaitchik, O.A., Pathak, V.K., Hu, W.-S., 2021. *Viruses* 13, 173.

Suthar, M.S., Diamond, M.S., Gale Jr, M., 2013. *Nat. Rev. Microbiol.* 11, 115–128.

Vandyck, K., Deval, J., 2021. *Curr. Opin. Virol.* 49, 36–40.

Yost, S.A., Marcotrigiano, J., 2013. *Curr. Opin. Virol.* 3, 137–142.

Zhang, L., Lin, D., Sun, X., Curth, U., Drosten, C., Sauerhering, L., Becker, S., Rox, K., Hilgenfeld, R., 2020. *Science* 368, 409–412.

Zhou, P., Yang, X.-L., Wang, X.-G., Hu, B., Zhang, L., Zhang, W., Si, H.-R., Zhu, Y., Li, B., Huang, C.-L., Chen, H.-D., Chen, J., Luo, Y., Guo, H., Jiang, R.-D., Liu, M.-Q., Chen, Y., Shen, X.-R., Wang, X., Zheng, X.-S., Zhao, K., Chen, Q.-J., Deng, F., Liu, L.-L., Yan, B., Zhan, F.-X., Wang, Y.-Y., Xiao, G.-F., Shi, Z.-L., 2020. *Nature* 579, 270–273.

Zumla, A., Chan, J.F.W., Azhar, E.I., Hui, D.S.C., Yuen, K.-Y., 2016. *Nat. Rev. Drug Discov.* 15, 327–347.

1 **Figure captions:**

2 Figure 1. A) The domain organization of SARS-CoV-2 polyproteins (pp1a or pp1ab)  
3 (top) and the BRET-based self-cleaving biosensor (bottom). B) An illustration of the  
4 BRET-based self-cleaving biosensor showing the relative position of GFP2, 3Clpro and  
5 RLuc8. C) The BRET ratio ( $\text{GFP}_{515\text{ nm}}/\text{RLuc}_{410\text{ nm}}$ ) of HEK 293T cells 24 hours post-  
6 transfection of the plasmid carrying biosensor pBRET-1. The 3CLpro inhibitor GC376  
7 at the indicated working concentrations were added right after transfection. The  
8 biosensor with a C145A mutation in 3CLpro (pBRET<sub>mut-1</sub>) was used as non-cleavable  
9 control. The data represent the mean  $\pm$  SD of three independent measurements. D and  
10 E) The self-cleavage of pBRET-1 in the presence of indicated concentrations of GC376  
11 was detected by Western blot analysis using an anti-HA antibody (D) or an anti-FLAG  
12 antibody (E).

13 Figure 2. A and B) The BRET ratio ( $\text{GFP}_{515\text{ nm}}/\text{RLuc}_{410\text{ nm}}$ ) of HEK 293T cells 24 hours  
14 post-transfection of different biosensor plasmids (pBRET-1 to pBRET-10). The 3CLpro  
15 inhibitor GC376 was diluted into cell culture media at the indicated working  
16 concentrations right after transfection. The data represent the mean  $\pm$  SD of three  
17 independent measurements. C) The amino acid sequences of the 3CLpro cleavage sites  
18 at the N- and C terminus of the ten biosensors, and the  $\text{EC}_{50}$  of GC376 measured using  
19 these biosensors.

20

Figure 1

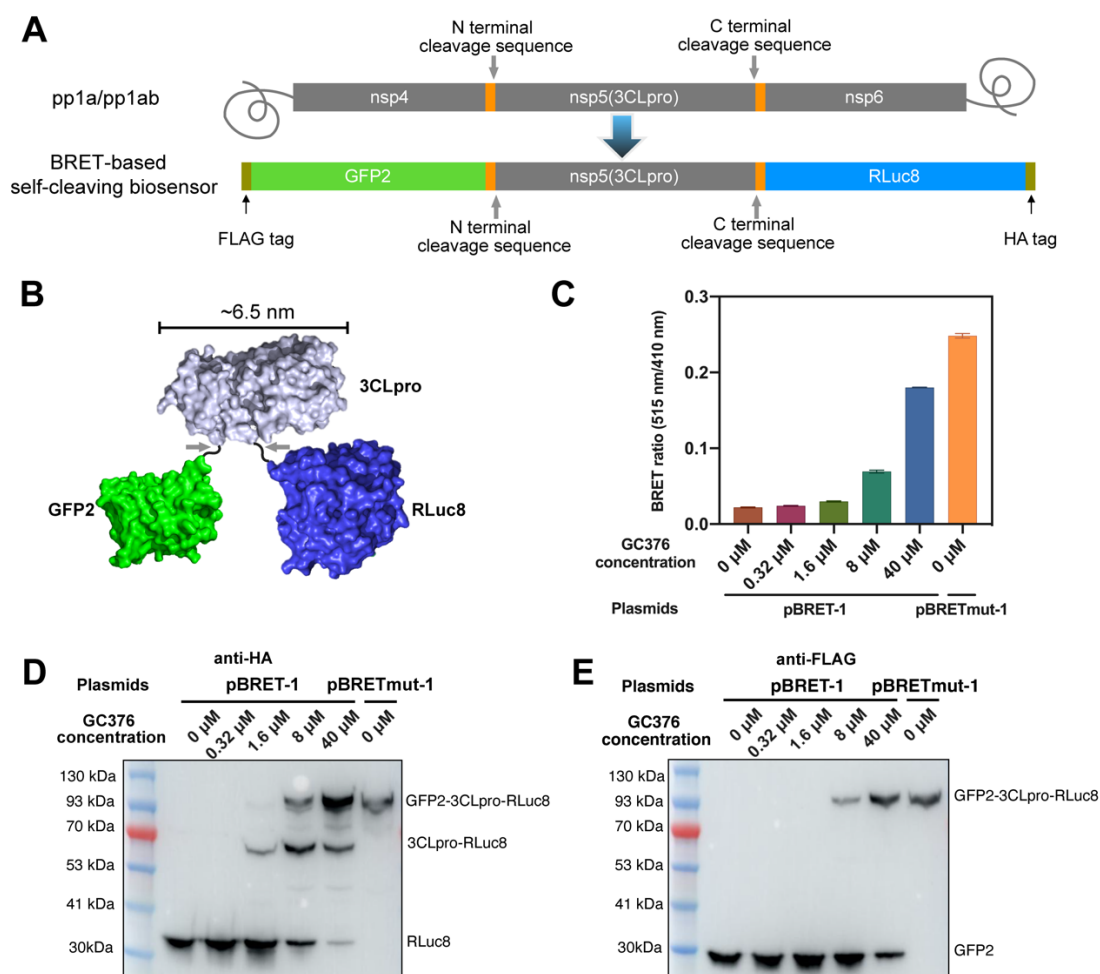

Figure 2

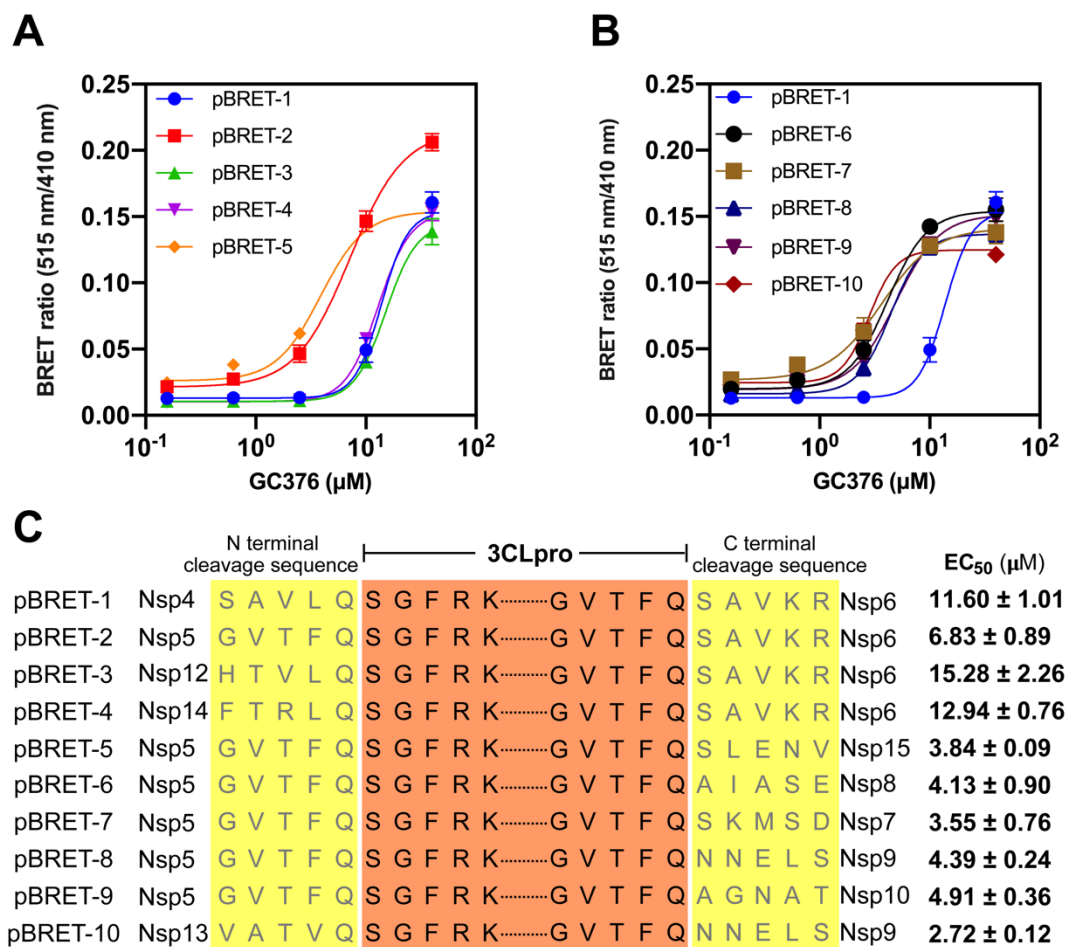

Table 1. The EC<sub>50</sub> values of four reported 3CLpro inhibitors measured using pBRET-10 and the corresponding EC<sub>50</sub> values from anti-SARS-CoV-2 assays.

| 3CLpro inhibitors | EC <sub>50</sub> measured using pBRET-10 (μM) | Reported EC <sub>50</sub> against SARS-CoV-2 (μM)                 | References                                    |
|-------------------|-----------------------------------------------|-------------------------------------------------------------------|-----------------------------------------------|
| GC376             | 2.72 ± 0.12                                   | 0.70 (Vero E6 cells, MOI 0.01);<br>2.20 (Vero E6 cells, MOI 0.01) | (Fu et al., 2020);<br>(Froggatt et al., 2020) |
| Boceprevir        | 36.31 ± 2.39                                  | 15.57 (Vero E6 cells, MOI 0.01)                                   | (Fu et al., 2020)                             |
| 11a               | 4.59 ± 0.23                                   | 0.53 (Vero E6 cells, MOI 0.05)                                    | (Dai et al., 2020)                            |
| 13b               | 37.11 ± 1.91                                  | 4~5 (Calu-3 cells, MOI 0.05)                                      | (Zhang et al., 2020)                          |
